# Supplementary material for: Air-stable, convenient to handle Pd based PEPPSI (pyridine enhanced precatalyst preparation, stabilization and initiation) themed precatalysts of N/O-functionalized N-heterocyclic carbenes and its utility in Suzuki–Miyaura cross-coupling reaction
Source: Royal Society of Chemistry journal article supplement (doi:10.1039/b706607d), 2007-01-01
Supplement: b706607d.pdf [file b706607d.pdf]

## Supporting Information

# **Air-Stable, Convenient to Handle Pd Based PEPPSI (Pyridine Enhanced Precatalyst Preparation, Stabilization and Initiation) Themed Precatalysts of *N/O*-Functionalized N-Heterocyclic Carbenes and its Utility in Suzuki-Miyaura Cross-Coupling Reaction**

Lipika Ray,<sup>a</sup> Mobin M. Shaikh<sup>b</sup> and Prasenjit Ghosh<sup>a\*</sup>

<sup>a</sup>Department of Chemistry and

<sup>b</sup>National Single Crystal X-ray Diffraction Facility,

Indian Institute of Technology Bombay,

Powai, Mumbai 400 076.

Email: [pghosh@chem.iitb.ac.in](mailto:pghosh@chem.iitb.ac.in)

Fax: +91-22-2572-3480

The density functional theory calculations were performed on the three transition metal complexes of N-heterocyclic carbenes, namely, *trans*-[1-(benzyl)-3-(*N*-*t*-butylacetamido)imidazol-2-ylidene]Pd(pyridine)Cl<sub>2</sub> (**2**), *trans*-[1-(2-hydroxy-cyclohexyl)-3-(benzyl)imidazol-2-ylidene]Pd(pyridine)Cl<sub>2</sub> (**3**) and *trans*-[1-(*o*-methoxybenzyl)-3-(*t*-butyl)imidazol-2-ylidene]Pd(pyridine)Br<sub>2</sub> (**4**) using GAUSSIAN 03<sup>1</sup> suite of quantum chemical programs.

Input Coordinates for Charge Decomposition Analysis of **2'**, **3'** and **4'**:

**Table S1.** B3LYP/SDD,6-31G\* optimized coordinates of **2'**.

Ground state electronic energy = - 2158.5727952 hartree/particle

|   |          |          |          |
|---|----------|----------|----------|
| O | -3.18681 | -3.01404 | 1.772608 |
| N | 1.277695 | -1.56344 | -0.26092 |
| N | -0.48862 | -1.57434 | 0.975699 |
| N | -3.59052 | -1.36321 | 0.219221 |
| C | 0.333479 | -0.75488 | 0.276648 |
| C | 1.045846 | -2.88563 | 0.098966 |
| H | 1.697705 | -3.68365 | -0.21805 |
| C | -0.06333 | -2.89419 | 0.878421 |
| H | -0.60335 | -3.69306 | 1.361538 |
| C | 2.358269 | -1.11917 | -1.15974 |
| H | 2.379399 | -0.0298  | -1.08408 |
| H | 2.07656  | -1.38036 | -2.18579 |
| C | 3.699643 | -1.72421 | -0.80532 |
| C | 4.310198 | -2.64371 | -1.66561 |
| H | 3.816241 | -2.92226 | -2.59426 |
| C | 5.551556 | -3.19977 | -1.34543 |
| H | 6.016608 | -3.91093 | -2.02282 |
| C | 6.189204 | -2.83994 | -0.15807 |
| H | 7.154582 | -3.27073 | 0.09392  |
| C | 5.58481  | -1.92069 | 0.70532  |
| H | 6.081155 | -1.63376 | 1.628437 |
| C | 4.347725 | -1.36308 | 0.385583 |
| H | 3.877485 | -0.64323 | 1.05137  |
| C | -1.67763 | -1.14991 | 1.717924 |
| H | -1.77558 | -0.07252 | 1.57862  |
| H | -1.53691 | -1.36888 | 2.779296 |
| C | -2.91243 | -1.93935 | 1.2377   |

|    |          |          |          |
|----|----------|----------|----------|
| C  | -4.73497 | -1.97878 | -0.49901 |
| C  | -5.16598 | -0.9695  | -1.57484 |
| H  | -5.47625 | -0.01999 | -1.12314 |
| H  | -6.01312 | -1.36891 | -2.14186 |
| H  | -4.35088 | -0.7637  | -2.27826 |
| O  | -4.29425 | -3.29953 | -1.15899 |
| H  | -3.47342 | -3.12198 | -1.86321 |
| H  | -5.13022 | -3.74317 | -1.71225 |
| H  | -3.96012 | -4.01306 | -0.40184 |
| C  | -5.89326 | -2.22328 | 0.485174 |
| H  | -5.59232 | -2.91799 | 1.272026 |
| H  | -6.75278 | -2.64503 | -0.0485  |
| H  | -6.20704 | -1.28161 | 0.949581 |
| H  | -3.15353 | -0.55828 | -0.2272  |
| C  | 1.168416 | 4.13182  | 0.041553 |
| H  | 2.089977 | 3.597852 | 0.239834 |
| C  | 1.132881 | 5.518926 | -0.06899 |
| H  | 2.054796 | 6.084716 | 0.016721 |
| C  | -0.09188 | 6.150049 | -0.27956 |
| H  | -0.1517  | 7.231517 | -0.36336 |
| C  | -1.23846 | 5.363734 | -0.3801  |
| H  | -2.21604 | 5.805358 | -0.54366 |
| C  | -1.12065 | 3.980925 | -0.27453 |
| H  | -1.97741 | 3.326081 | -0.37874 |
| Pd | 0.190705 | 1.22081  | 0.10813  |
| Cl | -1.59722 | 0.927676 | -1.42586 |
| Cl | 1.941473 | 1.391193 | 1.67422  |
| N  | 0.061557 | 3.371357 | -0.06313 |

**Table S2.** B3LYP/SDD,6-31G\* optimized coordinates of **3'**

Ground state electronic energy = - 2103.1995947 hartree/particle

|   |          |          |          |
|---|----------|----------|----------|
| O | -0.06485 | 2.8512   | 2.109311 |
| H | -0.30758 | 1.911097 | 2.226367 |
| N | 1.796834 | 0.711516 | -1.11288 |
| N | 0.185318 | 2.061647 | -0.61396 |
| C | 0.517455 | 0.750352 | -0.67163 |
| C | 1.258975 | 2.845247 | -1.01502 |
| H | 1.214265 | 3.92218  | -1.02798 |
| C | 2.270405 | 1.998367 | -1.32822 |
| H | 3.27794  | 2.187254 | -1.66334 |
| C | 2.581134 | -0.51019 | -1.33736 |
| H | 2.883899 | -0.53246 | -2.38923 |
| H | 1.889481 | -1.3418  | -1.18074 |
| C | 3.790483 | -0.60814 | -0.4286  |

|    |          |          |          |
|----|----------|----------|----------|
| C  | 3.641468 | -0.55528 | 0.965517 |
| H  | 2.653207 | -0.42346 | 1.400383 |
| C  | 4.757768 | -0.66856 | 1.793162 |
| H  | 4.632039 | -0.62529 | 2.871629 |
| C  | 6.031402 | -0.83998 | 1.242128 |
| H  | 6.898664 | -0.92874 | 1.891006 |
| C  | 6.185035 | -0.89593 | -0.14308 |
| H  | 7.171474 | -1.02767 | -0.57974 |
| C  | 5.067671 | -0.77663 | -0.97368 |
| H  | 5.190187 | -0.8197  | -2.05404 |
| C  | -1.10085 | 2.566913 | -0.11128 |
| H  | -1.65198 | 1.667228 | 0.182424 |
| C  | -0.90389 | 3.445391 | 1.143712 |
| H  | -0.38477 | 4.36786  | 0.842928 |
| C  | -2.28401 | 3.836855 | 1.697596 |
| H  | -2.13549 | 4.461453 | 2.585533 |
| H  | -2.80009 | 2.925117 | 2.032841 |
| C  | -3.132   | 4.565344 | 0.64191  |
| H  | -4.12153 | 4.804304 | 1.050217 |
| H  | -2.65669 | 5.526945 | 0.397751 |
| C  | -3.27446 | 3.731707 | -0.64177 |
| H  | -3.82136 | 4.295473 | -1.40709 |
| H  | -3.87196 | 2.833589 | -0.42892 |
| C  | -1.90591 | 3.30078  | -1.19549 |
| H  | -2.02538 | 2.643442 | -2.06419 |
| H  | -1.34782 | 4.186072 | -1.53327 |
| C  | -2.94481 | -2.81622 | -0.65154 |
| H  | -3.09209 | -2.15627 | -1.49822 |
| C  | -3.76928 | -3.91422 | -0.42227 |
| H  | -4.60316 | -4.10419 | -1.09014 |
| C  | -3.49741 | -4.75081 | 0.659083 |
| H  | -4.11974 | -5.6185  | 0.859361 |
| C  | -2.4094  | -4.4511  | 1.477352 |
| H  | -2.15408 | -5.07088 | 2.330671 |
| C  | -1.64021 | -3.32643 | 1.193173 |
| H  | -0.80358 | -3.03559 | 1.817211 |
| Pd | -0.64917 | -0.80557 | -0.25959 |
| Cl | -0.96852 | -1.02528 | -2.58106 |
| Cl | -0.29908 | -0.45286 | 2.063839 |
| N  | -1.8995  | -2.5214  | 0.144839 |

**Table S3.** B3LYP/SDD,6-31G\* optimized coordinates of 4'

Ground state electronic energy = - 6287.5150954 hartree/particle

|   |          |          |          |
|---|----------|----------|----------|
| O | 2.942783 | -1.36995 | 1.286216 |
| N | 0.631592 | 2.474777 | 0.300215 |
| N | 1.674488 | 0.759097 | -0.52231 |
| C | 0.469718 | 1.168295 | -0.04984 |
| C | 1.940054 | 2.86759  | 0.019913 |
| H | 2.300317 | 3.863046 | 0.21439  |
| C | 2.58786  | 1.796569 | -0.49345 |
| H | 3.607891 | 1.670989 | -0.81791 |
| C | -0.39161 | 3.476084 | 0.76657  |
| C | -1.66897 | 2.799867 | 1.276763 |
| H | -2.19467 | 2.269603 | 0.478479 |
| H | -2.33459 | 3.584047 | 1.655418 |
| H | -1.45917 | 2.095941 | 2.085772 |
| C | -0.72541 | 4.384579 | -0.43195 |
| H | 0.162832 | 4.912887 | -0.79592 |
| H | -1.46772 | 5.133547 | -0.13484 |
| H | -1.13626 | 3.789162 | -1.25338 |
| C | 0.220891 | 4.286346 | 1.926448 |
| H | 0.531513 | 3.623837 | 2.740921 |
| H | -0.53337 | 4.977653 | 2.315337 |
| H | 1.081351 | 4.88868  | 1.618677 |
| C | 1.930974 | -0.56999 | -1.11667 |
| H | 1.258587 | -1.2627  | -0.60655 |
| H | 1.639999 | -0.52512 | -2.17101 |
| C | 3.366348 | -1.01458 | -0.97996 |
| C | 3.847725 | -1.4389  | 0.279789 |
| C | 3.288202 | -1.83412 | 2.582648 |
| H | 3.577845 | -2.89286 | 2.562713 |
| H | 2.38335  | -1.70842 | 3.177785 |
| H | 4.105575 | -1.24137 | 3.0142   |
| C | 5.165864 | -1.88695 | 0.417411 |
| H | 5.538141 | -2.21584 | 1.381117 |
| C | 6.007022 | -1.91226 | -0.69962 |
| H | 7.0294   | -2.26243 | -0.58341 |
| C | 5.547754 | -1.49863 | -1.948   |
| H | 6.202937 | -1.524   | -2.81346 |

|    |          |          |          |
|----|----------|----------|----------|
| C  | 4.227904 | -1.05333 | -2.07632 |
| H  | 3.854414 | -0.7359  | -3.04748 |
| C  | -3.09303 | -2.05957 | -1.25813 |
| H  | -2.44428 | -1.8651  | -2.1039  |
| C  | -4.16535 | -2.94294 | -1.34535 |
| H  | -4.34362 | -3.47605 | -2.27361 |
| C  | -4.99212 | -3.11494 | -0.23637 |
| H  | -5.84086 | -3.79201 | -0.27661 |
| C  | -4.70604 | -2.39953 | 0.92527  |
| H  | -5.31757 | -2.49751 | 1.816364 |
| C  | -3.60412 | -1.54887 | 0.940795 |
| H  | -3.31742 | -1.00205 | 1.831157 |
| Pd | -1.11966 | -0.033   | -0.05786 |
| Br | -0.57274 | -0.73625 | 2.279119 |
| Br | -1.51038 | 0.754184 | -2.3978  |
| N  | -2.8111  | -1.37479 | -0.13339 |

**Table S4.** Comparison between selected distances [ $\text{\AA}$ ] and angles [ $^\circ$ ] in **2** (X-ray structure) and **2'** (computed structure).

| Parameter   | Exp.( <b>2</b> ) | Calcd.( <b>2'</b> ) | Parameter  | Exp. ( <b>2</b> ) | Calcd. ( <b>2'</b> ) |
|-------------|------------------|---------------------|------------|-------------------|----------------------|
| Pd1-C1      | 1.957(3)         | 1.988               | N1-C4      | 1.463(4)          | 1.474                |
| Pd1-Cl2     | 2.2913(9)        | 2.374               | N4-C21     | 1.336(4)          | 1.347                |
| Pd1-Cl1     | 2.3026(9)        | 2.355               | N4-C17     | 1.333(5)          | 1.347                |
| Pd1-N4      | 2.089(3)         | 2.161               | C20-C21    | 1.376(5)          | 1.392                |
| C1-N1       | 1.356(4)         | 1.354               | C19-C20    | 1.355(6)          | 1.394                |
| C1-N2       | 1.337(4)         | 1.355               | C18-C19    | 1.379(6)          | 1.394                |
| N1-C2       | 1.385(4)         | 1.389               | C17-C18    | 1.370(5)          | 1.392                |
| N2-C3       | 1.371(4)         | 1.390               | N3-C12     | 1.328(5)          | 1.352                |
| N2-C11      | 1.449(4)         | 1.464               | C10-O1     | 1.218(4)          | 1.231                |
| Cl2-Pd1-Cl1 | 178.14(3)        | 176.8               | Pd1-C1-N2  | 127.9(2)          | 126.9                |
| Cl2-Pd1-C1  | 91.24(9)         | 89.2                | N1-C1-N2   | 105.1(3)          | 105.5                |
| Cl1-Pd1-C1  | 87.62(9)         | 87.8                | Pd1-N4-C21 | 121.2(2)          | 121.0                |
| Cl2-Pd1-N4  | 89.44(8)         | 91.5                | Pd1-N4-C17 | 120.9(2)          | 120.4                |
| Cl1-Pd1-N4  | 91.74(8)         | 91.4                | C1-Pd1-N4  | 178.63(11)        | 179.2                |
| Pd1-C1-N1   | 126.9(2)         | 127.6               |            |                   |                      |

**Table S5.** Comparison between selected distances [ $\text{\AA}$ ] and angles [ $^\circ$ ] in **3** (X-ray structure) and **3'** (computed structure).

| Parameter   | Exp. ( <b>3</b> ) | Calcd. ( <b>3'</b> ) | Parameter  | Exp. ( <b>3</b> ) | Calcd. ( <b>3'</b> ) |
|-------------|-------------------|----------------------|------------|-------------------|----------------------|
| Pd1-C1      | 1.967(4)          | 1.988                | N1-C4      | 1.466(5)          | 1.469                |
| Pd1-C12     | 2.3068(10)        | 2.376                | N3-C21     | 1.343(6)          | 1.347                |
| Pd1-C11     | 2.3071(10)        | 2.354                | N3-C17     | 1.352(5)          | 1.346                |
| Pd1-N3      | 2.096(3)          | 2.161                | C20-C21    | 1.409(7)          | 1.392                |
| C1-N1       | 1.345(5)          | 1.354                | C19-C20    | 1.360(8)          | 1.394                |
| C1-N2       | 1.343(5)          | 1.354                | C18-C19    | 1.368(8)          | 1.393                |
| N1-C3       | 1.386(6)          | 1.388                | C17-C18    | 1.376(6)          | 1.392                |
| N2-C2       | 1.368(6)          | 1.388                | C12-O1     | 1.397(6)          | 1.410                |
| N2-C11      | 1.496(6)          | 1.470                |            |                   |                      |
| Cl2-Pd1-C11 | 177.74(4)         | 176.7                | Pd1-C1-N2  | 128.1(3)          | 127.2                |
| Cl2-Pd1-C1  | 88.70(11)         | 90.0                 | N1-C1-N2   | 106.4(4)          | 105.8                |
| Cl1-Pd1-C1  | 89.07(11)         | 87.0                 | Pd1-N3-C21 | 122.6(3)          | 120.6                |
| Cl2-Pd1-N3  | 91.64(9)          | 91.1                 | Pd1-N3-C17 | 119.7(3)          | 120.8                |
| Cl1-Pd1-N3  | 90.59(9)          | 91.8                 | C1-Pd1-N3  | 179.66(14)        | 178.6                |
| Pd1-C1-N1   | 125.5(3)          | 126.8                |            |                   |                      |

**Table S6.** Comparison between selected distances [ $\text{\AA}$ ] and angles [ $^\circ$ ] in **4** (X-ray structure) and **4'** (computed structure).

| Parameter   | Exp. ( <b>4</b> ) | Calcd. ( <b>4'</b> ) | Parameter  | Exp. ( <b>4</b> ) | Calcd. ( <b>4'</b> ) |
|-------------|-------------------|----------------------|------------|-------------------|----------------------|
| Pd1-C1      | 1.953(9)          | 1.992                | N1-C4      | 1.498(12)         | 1.506                |
| Pd1-Br2     | 2.3929(13)        | 2.499                | N3-C20     | 1.337(20)         | 1.346                |
| Pd1-Br1     | 2.3993(13)        | 2.501                | N3-C16     | 1.342(12)         | 1.347                |
| Pd1-N3      | 2.100(7)          | 2.160                | C19-C20    | 1.385(14)         | 1.392                |
| C1-N1       | 1.359(11)         | 1.357                | C18-C19    | 1.378(15)         | 1.394                |
| C1-N2       | 1.341(12)         | 1.362                | C17-C18    | 1.354(15)         | 1.394                |
| N1-C2       | 1.404(12)         | 1.382                | C16-C17    | 1.406(14)         | 1.392                |
| N2-C3       | 1.365(12)         | 1.395                | C10-O1     | 1.388(13)         | 1.355                |
| N2-C8       | 1.506(11)         | 1.478                |            |                   |                      |
| Br2-Pd1-Br1 | 173.87(5)         | 175.9                | Pd1-C1-N2  | 121.1(6)          | 121.7                |
| Br2-Pd1-C1  | 86.3(2)           | 86.5                 | N1-C1-N2   | 105.8(8)          | 105.8                |
| Br1-Pd1-C1  | 87.6(2)           | 89.5                 | Pd1-N3-C20 | 122.4(6)          | 120.9                |
| Br2-Pd1-N3  | 92.58(19)         | 92.3                 | Pd1-N3-C16 | 119.3(6)          | 120.6                |
| Br1-Pd1-N3  | 93.5(2)           | 91.6                 | C1-Pd1-N3  | 176.0(3)          | 177.8                |
| Pd1-C1-N1   | 133.1(7)          | 132.4                |            |                   |                      |

[1]. GAUSSIAN 03: Gaussian 03, Revision C.02, Frisch, M. J.; Trucks, G. W.; Schlegel, H. B.; Scuseria, G. E.; Robb, M. A.; Cheeseman, J. R.; Montgomery, Jr., J. A.; Vreven, T.; Kudin, K. N.; Burant, J. C.; Millam, J. M.; Iyengar, S. S.; Tomasi, J.; Barone, V.; Mennucci, B.; Cossi, M.; Scalmani, G.; Rega, N.; Petersson, G. A.; Nakatsuji, H.; Hada, M.; Ehara, M.; Toyota, K.; Fukuda, R.; Hasegawa, J.; Ishida, M.; Nakajima, T.; Honda, Y.; Kitao, O.; Nakai, H.; Klene, M.; Li, X.; Knox, J. E.; Hratchian, H. P.; Cross, J. B.; Bakken, V.; Adamo, C.; Jaramillo, J.; Gomperts, R.; Stratmann, R. E.; Yazyev, O.; Austin, A. J.; Cammi, R.; Pomelli, C.; Ochterski, J. W.; Ayala, P. Y.; Morokuma, K.; Voth, G. A.; Salvador, P.; Dannenberg, J. J.; Zakrzewski, V. G.; Dapprich, S.; Daniels, A. D.; Strain, M. C.; Farkas, O.; Malick, D. K.; Rabuck, A. D.; Raghavachari, K.; Foresman, J. B.; Ortiz, J. V.; Cui, Q.; Baboul, A. G.; Clifford, S.; Cioslowski, J.; Stefanov, B. B.; Liu, G.; Liashenko, A.; Piskorz, P.; Komaromi, I.; Martin, R. L.; Fox, D. J.; Keith, T.; Al-Laham, M. A.; Peng, C. Y.; Nanayakkara, A.; Challacombe, M.; Gill, P. M. W.; Johnson, B.; Chen, W.; Wong, M. W.; Gonzalez, C.; and Pople, J. A.; Gaussian, Inc., Wallingford CT, 2004.
